# Supplementary material for: Nitrification in the oligotrophic Atlantic Ocean
Source: Copernicus journal article supplement (doi:10.5194/bg-2021-184), 2021-08-09
Supplement: Supplementary file [file bg-2021-184-AC1-supplement.pdf]

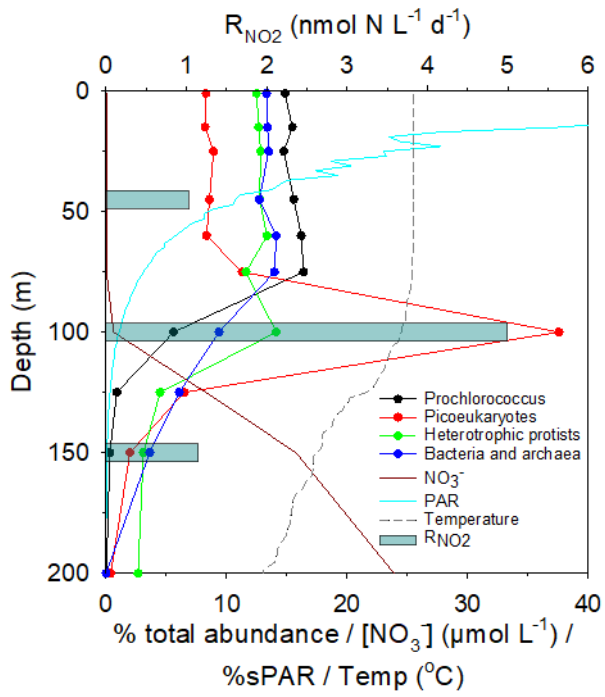

**Figure 6.**  $R_{NO_2}$  measurements at 7 °S within the context of selected physical, chemical and biological measurements, illustrating relationships between water column characteristics.
